# Supplementary material
Source: ML conference proceedings conference paper supplement (https://proceedings.neurips.cc/paper_files/paper/2015/hash/03e0704b5690a2dee1861dc3ad3316c9-Abstract.html)
Supplement: Supplementary file [file 03e0704b5690a2dee1861dc3ad3316c9-Supplemental.zip]

## A The incremental algorithm

Let  $(x_i, y_i)_{i=1}^n$  be the dataset and  $(\tilde{x}_i)_{i=1}^m$  be the selected Nyström points. We want to compute  $\tilde{\alpha}$  of Eq. 5, incrementally in  $m$ . Towards this goal we compute an incremental Cholesky decomposition  $R_t$  for  $t \in \{1, \dots, m\}$  of the matrix  $G_t = K_{nt}^\top K_{nt} + \lambda n K_{tt}$ , and the coefficients  $\tilde{\alpha}_t$  by  $\tilde{\alpha}_t = R_t^{-1} R_t^{-\top} K_{nt}^\top y$ . Note that, for any  $1 \leq t \leq m-1$ , by assuming  $G_t = R_t^\top R_t$  for an upper triangular matrix  $R_t$ , we have

$$G_{t+1} = \begin{pmatrix} G_t & c_{t+1} \\ c_{t+1}^\top & \gamma_{t+1} \end{pmatrix} = \begin{pmatrix} R_t & 0 \\ 0 & 0 \end{pmatrix}^\top \begin{pmatrix} R_t & 0 \\ 0 & 0 \end{pmatrix} + C_{t+1} \quad \text{with} \quad C_{t+1} = \begin{pmatrix} 0 & c_{t+1} \\ c_{t+1}^\top & \gamma_{t+1} \end{pmatrix},$$

and  $c_{t+1}, \gamma_{t+1}$  as in Section 4.1. Note moreover that  $G_1 = \gamma_1$ . Thus if we decompose the matrix  $C_{t+1}$  in the form  $C_{t+1} = u_{t+1} u_{t+1}^\top - v_{t+1} v_{t+1}^\top$  we are able compute  $R_{t+1}$ , the Cholesky matrix of  $G_{t+1}$ , by updating a bordered version of  $R_t$  with two rank-one Cholesky updates. This is exactly Algorithm 1 with  $u_{t+1}$  and  $v_{t+1}$  as in Section 4.1. Note that the rank-one Cholesky update requires  $O(t^2)$  at each call, while the computation of  $c_t$  requires  $O(nt)$  and the ones of  $\tilde{\alpha}_t$  requires to solve two triangular linear systems, that is  $O(t^2 + nt)$ . Therefore the total cost for computing  $\tilde{\alpha}_2, \dots, \tilde{\alpha}_m$  is  $O(nm^2 + m^3)$ .

## B Preliminary definitions

We begin introducing several operators that will be useful in the following. Let  $z_1, \dots, z_m \in \mathcal{H}$  and for all  $f \in \mathcal{H}, a \in \mathbb{R}^m$ , let

$$\begin{aligned} Z_m : \mathcal{H} &\rightarrow \mathbb{R}^m, & Z_m f &= (\langle z_1, f \rangle_{\mathcal{H}}, \dots, \langle z_m, f \rangle_{\mathcal{H}}), \\ Z_m^* : \mathbb{R}^m &\rightarrow \mathcal{H}, & Z_m^* a &= \sum_{i=1}^m a_i z_i. \end{aligned}$$

Let  $S_n = \frac{1}{\sqrt{n}} Z_m$  and  $S_n^* = \frac{1}{\sqrt{n}} Z_m^*$  the operators obtained taking  $m = n$  and  $z_i = K_{x_i}, \forall i = 1, \dots, n$  in the above definitions. Moreover, for all  $f, g \in \mathcal{H}$  let

$$C_n : \mathcal{H} \rightarrow \mathcal{H}, \quad \langle f, C_n g \rangle_{\mathcal{H}} = \frac{1}{n} \sum_{i=1}^n f(x_i) g(x_i).$$

The above operators are linear and finite rank. Moreover  $C_n = S_n^* S_n$  and  $K_n = n S_n S_n^*$ , and further  $B_{nm} = \sqrt{n} S_n Z_m^* \in \mathbb{R}^{n \times m}, G_{mm} = Z_m Z_m^* \in \mathbb{R}^{m \times m}$  and  $\tilde{K}_n = B_{nm} G_{mm}^\dagger B_{nm}^\top \in \mathbb{R}^{n \times n}$ .

## C Representer theorem for Nyström computational regularization and extensions

In this section we consider explicit representations of the estimator obtained via Nyström computational regularization and extensions. Indeed, we consider a general subspace  $\mathcal{H}_m$  of  $\mathcal{H}$ , and the following problem

$$\hat{f}_{\lambda, m} = \operatorname{argmin}_{f \in \mathcal{H}_m} \frac{1}{n} \sum_{i=1}^n (f(x_i) - y_i)^2 + \lambda \|f\|_{\mathcal{H}}^2. \quad (11)$$

In the following lemmas, we show three different characterizations of  $\hat{f}_{\lambda, m}$ .

**Lemma 1.** *Let  $\hat{f}_{\lambda, m}$  be the solution of the problem in Eq. (11). Then it is characterized by the following equation*

$$(P_m C_n P_m + \lambda I) \hat{f}_{\lambda, m} = P_m S_n^* \hat{y}_n, \quad (12)$$

with  $P_m$  the projection operator with range  $\mathcal{H}_m$  and  $\hat{y}_n = \frac{1}{\sqrt{n}} y$ .

*Proof.* The proof proceeds in three steps. First, note that, by rewriting Problem (11) with the notation introduced in the previous section, we obtain,

$$\hat{f}_{\lambda, m} = \operatorname{argmin}_{f \in \mathcal{H}_m} \|S_n f - \hat{y}_n\|^2 + \lambda \|f\|_{\mathcal{H}}^2. \quad (13)$$

This problem is strictly convex and coercive, therefore admits a unique solution. Second, we show that its solution coincide to the one of the following problem,

$$\hat{f}^* = \operatorname{argmin}_{f \in \mathcal{H}} \|S_n P_m f - \hat{y}_n\|^2 + \lambda \|f\|_{\mathcal{H}}^2. \quad (14)$$

Note that the above problem is again strictly convex and coercive. To show that  $\hat{f}_{\lambda,m} = \hat{f}^*$ , let  $\hat{f}^* = a + b$  with  $a \in \mathcal{H}_m$  and  $b \in \mathcal{H}_m^\perp$ . A necessary condition for  $\hat{f}^*$  to be optimal, is that  $b = 0$ , indeed, considering that  $P_m b = 0$ , we have

$$\|S_n P_m \hat{f}^* - \hat{y}_n\|^2 + \lambda \|\hat{f}^*\|_{\mathcal{H}}^2 = \|S_n P_m a - \hat{y}_n\|^2 + \lambda \|a\|_{\mathcal{H}}^2 + \lambda \|b\|_{\mathcal{H}}^2 \geq \|S_n P_m a - \hat{y}_n\|^2 + \lambda \|a\|_{\mathcal{H}}^2.$$

This means that  $\hat{f}^* \in \mathcal{H}_m$ , but on  $\mathcal{H}_m$  the functionals defining Problem (13) and Problem (14) are identical because  $P_m f = f$  for any  $f \in \mathcal{H}_m$  and so  $\hat{f}_{\lambda,m} = \hat{f}^*$ . Therefore, by computing the derivative of the functional of Problem (14), we see that  $\hat{f}_{\lambda,m}$  is given by Eq. (12).  $\square$

Using the above results, we can give an equivalent representations of the function  $\hat{f}_{\lambda,m}$ . Towards this end, let  $Z_m$  be a linear operator as in Sect. B such that the range of  $Z_m^*$  is exactly  $\mathcal{H}_m$ . Moreover, let

$$Z_m = U \Sigma V^*$$

be the SVD of  $Z_m$  where  $U : \mathbb{R}^t \rightarrow \mathbb{R}^m$ ,  $\Sigma : \mathbb{R}^t \rightarrow \mathbb{R}^t$ ,  $V : \mathbb{R}^t \rightarrow \mathcal{H}$ ,  $t \leq m$  and  $\Sigma = \operatorname{diag}(\sigma_1, \dots, \sigma_t)$  with  $\sigma_1 \geq \dots \geq \sigma_t > 0$ ,  $U^* U = I_t$  and  $V^* V = I_t$ . Then the orthogonal projection operator  $P_m$  is given by  $P_m = V V^*$  and the range of  $P_m$  is exactly  $\mathcal{H}_m$ . In the following lemma we give a characterization of  $\hat{f}_{\lambda,m}$  that will be useful in the proof of the main theorem.

**Lemma 2.** *Given the above definitions,  $\hat{f}_{\lambda,m}$  can be written as*

$$\hat{f}_{\lambda,m} = V(V^* C_n V + \lambda I)^{-1} V^* S_n^* \hat{y}_n. \quad (15)$$

*Proof.* By Lemma 1, we know that  $\hat{f}_{\lambda,m}$  is written as in Eq. (12). Now, note that  $\hat{f}_{\lambda,m} = P_m \hat{f}_{\lambda,m}$  and Eq. (12) imply  $(P_m C_m P_m + \lambda I) P_m \hat{f}_{\lambda,m} = P_m S_n^* \hat{y}_n$ , that is equivalent to

$$V(V^* C_n V + \lambda I) V^* \hat{f}_{\lambda,m} = V V^* S_n^* \hat{y}_n,$$

by substituting  $P_m$  with  $V V^*$ . Thus by premultiplying the previous equation by  $V^*$  and dividing by  $V^* C_m V + \lambda I$ , we have

$$V^* \hat{f}_{\lambda,m} = (V^* C_m V + \lambda I)^{-1} V^* S_n^* \hat{y}_n.$$

Finally, by premultiplying by  $V$ ,

$$\hat{f}_{\lambda,m} = P_m \hat{f}_{\lambda,m} = V(V^* C_m V + \lambda I)^{-1} V^* S_n^* \hat{y}_n. \quad \square$$

Finally, the following result provide a characterization of the solution useful for computations.

**Lemma 3** (Representer theorem for  $\hat{f}_{\lambda,m}$ ). *Given the above definitions, we have that  $\hat{f}_{\lambda,m}$  can be written as*

$$\hat{f}_{\lambda,m}(x) = \sum_{i=1}^m \tilde{\alpha}_i z_i(x), \quad \text{with } \tilde{\alpha} = (B_{nm}^\top B_{nm} + \lambda n G_{mm})^\dagger B_{nm}^\top y \quad \forall x \in X. \quad (16)$$

*Proof.* According to the definitions of  $B_{nm}$  and  $G_{mm}$  we have that

$$\tilde{\alpha} = (B_{nm}^\top B_{nm} + \lambda n G_{mm})^\dagger B_{nm}^\top y = ((Z_m S_n^*)(S_n Z_m^*) + \lambda(Z_m Z_m^*))^\dagger (Z_m S_n^*) \hat{y}_n.$$

Moreover, according to the definition of  $Z_m$  we have

$$\hat{f}_{\lambda,m}(x) = \sum_{i=1}^m \tilde{\alpha}_i \langle z_i, K_x \rangle = \langle Z_m K_x, \tilde{\alpha} \rangle_{\mathbb{R}^m} = \langle K_x, Z_m^* \tilde{\alpha} \rangle_{\mathcal{H}} \quad \forall x \in X,$$

so that

$$\hat{f}_{\lambda,m} = Z_m^* ((Z_m S_n^*) (S_n Z_m^*) + \lambda (Z_m Z_m^*))^\dagger (Z_m S_n^*) \hat{y}_n = Z_m^* (Z_m C_{n\lambda} Z_m^*)^\dagger (Z_m S_n^*) \hat{y}_n,$$

where  $C_{n\lambda} = C_n + \lambda I$ . Let  $F = U\Sigma$ ,  $G = V^* C_n V + \lambda I$ ,  $H = \Sigma U^\top$ , and note that  $F$ ,  $GH$ ,  $G$  and  $H$  are full-rank matrices, then we can perform the full-rank factorization of the pseudo-inverse (see Eq.24, Thm. 5, Chap. 1 of [1]) obtaining

$$(Z_m C_{n\lambda} Z_m^*)^\dagger = (FGH)^\dagger = H^\dagger (FG)^\dagger = H^\dagger G^{-1} F^\dagger = U\Sigma^{-1} (V^* C_n V + \lambda I)^{-1} \Sigma^{-1} U^*.$$

Finally, simplifying  $U$  and  $\Sigma$ , we have

$$\begin{aligned} \hat{f}_{\lambda,m} &= Z_m^* (Z_m C_{n\lambda} Z_m^*)^\dagger (Z_m S_n^*) \hat{y}_n \\ &= V\Sigma U^* U\Sigma^{-1} (V^* C_n V + \lambda I)^{-1} \Sigma^{-1} U^* U\Sigma V^* S_n^* \hat{y}_n \\ &= V(V^* C_n V + \lambda I)^{-1} V^* S_n^* \hat{y}_n. \end{aligned}$$

□

### C.1 Extensions

Inspection of the proof shows that our analysis extends beyond the class of subsampling schemes in Theorem 1. Indeed, the error decomposition Theorem 2 directly applies to a large family of approximation schemes. Several further examples are described next.

**KRLS and Generalized Nyström** In general we could choose an arbitrary  $\mathcal{H}_m \subseteq \mathcal{H}$ . Let  $Z_m : \mathcal{H} \rightarrow \mathbb{R}^m$  be a linear operator such that

$$\mathcal{H}_m = \text{ran } Z_m^* = \{f \mid f = Z_m^* \alpha, \alpha \in \mathbb{R}^m\}. \quad (17)$$

Without loss of generality,  $Z_m^*$  is expressible as  $Z_m^* = (z_1, \dots, z_m)^\top$  with  $z_1, \dots, z_m \in \mathcal{H}$ , therefore, according to Section B and to Lemma 3, the solution of KRLS approximated with the generalized Nyström scheme is

$$\hat{f}_{\lambda,m}(x) = \sum_{i=1}^m \tilde{\alpha}_i z_i(x), \quad \text{with } \tilde{\alpha} = (B_{nm}^\top B_{nm} + \lambda n G_{mm})^\dagger B_{nm}^\top y \quad (18)$$

with  $B_{nm} \in \mathbb{R}^{n \times m}$ ,  $(B_{nm})_{ij} = z_j(x_i)$  and  $G_{mm} \in \mathbb{R}^{m \times m}$ ,  $(G_{mm})_{ij} = \langle z_i, z_j \rangle_{\mathcal{H}}$ , or equivalently

$$\hat{f}_{\lambda,m}(x) = \sum_{i=1}^m \tilde{\alpha}_i z_i(x), \quad \tilde{\alpha} = G_{mm}^\dagger B_{nm}^\top (\tilde{K}_n + \lambda n I)^\dagger \hat{y}_n, \quad \tilde{K}_n = B_{nm} G_{mm}^\dagger B_{nm}^\top \quad (19)$$

The following are some examples of Generalized Nyström approximations.

**Plain Nyström with various sampling schemes [2–4]** For a realization  $s : \mathbb{N} \rightarrow \{1, \dots, n\}$  of a given sampling scheme, we choose  $Z_m = S_m$  with  $S_m^* = (K_{x_{s(1)}}, \dots, K_{x_{s(m)}})^\top$  where  $(x_i)_{i=1}^n$  is the training set. With such  $Z_m$  we obtain  $\tilde{K}_n = K_{nm} (K_{mm})^\dagger K_{nm}^\top$  and so Eq. (18) becomes exactly Eq. (5).

**Reduced rank Plain Nyström [5]** Let  $p \geq m$ ,  $S_p$  as in the previous example, the linear operator associated to  $p$  points of the dataset. Let  $K_{pp} = S_p S_p^\top \in \mathbb{R}^{p \times p}$ , that is  $(K_{pp})_{ij} = K(x_i, x_j)$ . Let  $K_{pp} = \sum_{i=1}^p \sigma_i u_i u_i^\top$  its eigenvalue decomposition and  $U_m = (u_1, \dots, u_m)$ . Let  $(K_{pp})_m = U_m^\top K_{pp} U_m$  be the  $m$ -rank approximation of  $K_{pp}$ . We approximate this family by choosing  $Z_m = U_m^\top S_p$ , indeed we obtain  $\tilde{K}_n = K_{nm} U_m (U_m^\top K_{pp} U_m)^\dagger U_m^\top K_{nm}^\top = K_{nm} (K_{pp})_m^\dagger K_{nm}^\top$ .

**Nyström with sketching matrices [6]** We cover this family by choosing  $Z_m = R_m S_n$ , where  $S_n$  is the same operator as in the plain Nyström case where we select all the points of the training set and  $R_m$  a  $m \times n$  sketching matrix. In this way we have  $\tilde{K}_n = K_n R_m^* (R_m K_n R_m^*)^\dagger R_m K_n$ , that is exactly the SPSPD sketching model.

## D Probabilistic inequalities

In this section we collect five main probabilistic inequalities needed in the proof of the main result. We let  $\rho_X$  denote the marginal distribution of  $\rho$  on  $X$  and  $\rho(\cdot|x)$  the conditional distribution on  $\mathbb{R}$  given  $x \in X$ . Lemmas 6, 7 and especially Proposition 1 are new and of interest in their own right.

The first result is essentially taken from [7].

**Lemma 4** (Sample Error). *Under Assumptions 1, 2 and 3, for any  $\delta > 0$ , the following holds with probability  $1 - \delta$*

$$\|(C + \lambda I)^{-1/2}(S_n^* \hat{y}_n - C_n f_{\mathcal{H}})\| \leq 2 \left( \frac{M \sqrt{\mathcal{N}_{\infty}(\lambda)}}{n} + \sqrt{\frac{\sigma^2 \mathcal{N}(\lambda)}{n}} \right) \log \frac{2}{\delta}.$$

*Proof.* The proof is given in [7] for bounded kernels and the slightly stronger condition  $\int (e^{\frac{|y-f_{\mathcal{H}}(x)|}{M}} - \frac{|y-f_{\mathcal{H}}(x)|}{M} - 1) d\rho(y|x) \leq \sigma^2/M^2$  in place of Assumption 2. More precisely, note that

$$(C + \lambda I)^{-1/2}(S_n^* \hat{y}_n - C_n f_{\mathcal{H}}) = \frac{1}{n} \sum_{i=1}^n \zeta_i,$$

where  $\zeta_1, \dots, \zeta_n$  are i.i.d. random variables, defined as  $\zeta_i = (C + \lambda I)^{-1/2} K_{x_i}(y_i - f_{\mathcal{H}}(x_i))$ . For any  $1 \leq i \leq n$ ,

$$\begin{aligned} \mathbb{E} \zeta_i &= \int_{X \times \mathbb{R}} (C + \lambda I)^{-1/2} K_{x_i}(y_i - f_{\mathcal{H}}(x_i)) d\rho(x_i, y_i) \\ &= \int_X (C + \lambda I)^{-1/2} K_{x_i} \int_{\mathbb{R}} (y_i - f_{\mathcal{H}}(x_i)) d\rho(y_i|x_i) d\rho_X(x_i) = 0, \end{aligned}$$

almost everywhere by Assumption 1 (see Step 3.2 of Thm. 4 in [7]). In the same way we have

$$\begin{aligned} \mathbb{E} \|\zeta_i\|^p &= \int_{X \times \mathbb{R}} \|(C + \lambda I)^{-1/2} K_{x_i}(y_i - f_{\mathcal{H}}(x_i))\|^p d\rho(x_i, y_i) \\ &= \int_X \|(C + \lambda I)^{-1/2} K_{x_i}\|^p \int_{\mathbb{R}} |y_i - f_{\mathcal{H}}(x_i)|^p d\rho(y_i|x_i) d\rho_X(x_i) \\ &\leq \sup_{x \in X} \|(C + \lambda I)^{-1/2} K_x\|^{p-2} \int_X \|(C + \lambda I)^{-1/2} K_{x_i}\|^2 \int_{\mathbb{R}} |y_i - f_{\mathcal{H}}(x_i)|^p d\rho(y_i|x_i) d\rho_X(x_i) \\ &\leq \frac{1}{2} p! \sqrt{\sigma^2 \mathcal{N}(\lambda)}^2 (M \sqrt{\mathcal{N}_{\infty}(\lambda)})^{p-2}, \end{aligned}$$

where  $\sup_{x \in X} \|(C + \lambda I)^{-1/2} K_x\| = \sqrt{\mathcal{N}_{\infty}(\lambda)}$  and  $\int_X \|(C + \lambda I)^{-1/2} K_{x_i}\|^2 = \mathcal{N}(\lambda)$  by Assumption 3, while the bound on the moments of  $y - f(x)$  is given in Assumption 2. Finally, to concentrate the sum of random vectors, we apply Prop. 11.  $\square$

The next result is taken from [8].

**Lemma 5.** *Under Assumption 3, for any  $\delta \geq 0$  and  $\frac{9\kappa^2}{n} \log \frac{n}{\delta} \leq \lambda \leq \|C\|$ , the following inequality holds with probability at least  $1 - \delta$ ,*

$$\|(C_n + \lambda I)^{-1/2} C^{1/2}\| \leq \|(C_n + \lambda I)^{-1/2} (C + \lambda I)^{1/2}\| \leq 2.$$

*Proof.* Lemma 7 of [8] gives an extended version of the above result. Our bound on  $\lambda$  is scaled by  $\kappa^2$  because in [8] it is assumed  $\kappa \leq 1$ .  $\square$

**Lemma 6** (plain Nyström approximation). *Under Assumption 3, let  $J$  be a partition of  $\{1, \dots, n\}$  chosen uniformly at random from the partitions of cardinality  $m$ . Let  $\lambda > 0$ , for any  $\delta > 0$ , such that  $m \geq 67 \log \frac{4\kappa^2}{\lambda\delta} \vee 5\mathcal{N}_{\infty}(\lambda) \log \frac{4\kappa^2}{\lambda\delta}$ , the following holds with probability  $1 - \delta$*

$$\|(I - P_m) C^{1/2}\|^2 \leq 3\lambda,$$

where  $P_m$  is the projection operator on the subspace  $\mathcal{H}_m = \text{span}\{K_{x_j} \mid j \in J\}$ .

*Proof.* Define the linear operator  $C_m : \mathcal{H} \rightarrow \mathcal{H}$ , as  $C_m = \frac{1}{m} \sum_{j \in J} K_{x_j} \otimes K_{x_j}$ . Now note that the range of  $C_m$  is exactly  $\mathcal{H}_m$ . Therefore, by applying Prop. 3 and 7, we have that

$$\|(I - P_m)C_\lambda^{1/2}\|^2 \leq \lambda \|(C_m + \lambda I)^{-1/2}C_\lambda^{1/2}\|^2 \leq \frac{\lambda}{1 - \beta(\lambda)},$$

with  $\beta(\lambda) = \lambda_{\max} \left( C_\lambda^{-1/2}(C - C_m)C_\lambda^{-1/2} \right)$ . To upperbound  $\frac{\lambda}{1 - \beta(\lambda)}$  we need an upperbound for  $\beta(\lambda)$ . Considering that, given the partition  $J$ , the random variables  $\zeta_j = K_{x_j} \otimes K_{x_j}$  are i.i.d., then we can apply Prop. 8, to obtain

$$\beta(\lambda) \leq \frac{2w}{3m} + \sqrt{\frac{2w\mathcal{N}_\infty(\lambda)}{m}},$$

where  $w = \log \frac{4\text{Tr}(C)}{\lambda\delta}$  with probability  $1 - \delta$ . Thus, by choosing  $m \geq 67w \vee 5\mathcal{N}_\infty(\lambda)w$ , we have that  $\beta(\lambda) \leq 2/3$ , that is

$$\|(I - P_m)C_\lambda^{1/2}\|^2 \leq 3\lambda.$$

Finally, note that by definition  $\text{Tr}(C) \leq \kappa^2$ . □

**Lemma 7** (Nyström approximation for ALS selection method). *Let  $(\hat{l}_i(t))_{i=1}^n$  be the collection of approximate leverage scores. Let  $\lambda > 0$  and  $P_\lambda$  be defined as  $P_\lambda(i) = \hat{l}_i(\lambda) / \sum_{j \in N} \hat{l}_j(\lambda)$  for any  $i \in N$  with  $N = \{1, \dots, n\}$ . Let  $\mathfrak{I} = (i_1, \dots, i_m)$  be a collection of indices independently sampled with replacement from  $N$  according to the probability distribution  $P_\lambda$ . Let  $P_m$  be the projection operator on the subspace  $\mathcal{H}_m = \text{span}\{K_{x_j} | j \in J\}$  and  $J$  be the subcollection of  $\mathfrak{I}$  with all the duplicates removed. Under Assumption 3, for any  $\delta > 0$  the following holds with probability  $1 - 2\delta$*

$$\|(I - P_m)(C + \lambda I)^{1/2}\| \leq 3\lambda,$$

when the following conditions are satisfied:

1. there exists a  $T \geq 1$  and a  $\lambda_0 > 0$  such that  $(\hat{l}_i(t))_{i=1}^n$  are  $T$ -approximate leverage scores for any  $t \geq \lambda_0$  (see Def. 1),
2.  $n \geq 1655\kappa^2 + 223\kappa^2 \log \frac{2\kappa^2}{\delta}$ ,
3.  $\lambda_0 \vee \frac{19\kappa^2}{n} \log \frac{2n}{\delta} \leq \lambda \leq \|C\|$ ,
4.  $m \geq 334 \log \frac{8n}{\delta} \vee 78T^2\mathcal{N}(\lambda) \log \frac{8n}{\delta}$ .

*Proof.* Define  $\tau = \delta/4$ . Next, define the diagonal matrix  $H \in \mathbb{R}^{n \times n}$  with  $(H)_{ii} = 0$  when  $P_\lambda(i) = 0$  and  $(H)_{ii} = \frac{nq(i)}{mP_\lambda(i)}$  when  $P_\lambda(i) > 0$ , where  $q(i)$  is the number of times the index  $i$  is present in the collection  $\mathfrak{I}$ . We have that

$$S_n^* H S_n = \frac{1}{m} \sum_{i=1}^n \frac{q(i)}{P_\lambda(i)} K_{x_i} \otimes K_{x_i} = \frac{1}{m} \sum_{j \in J} \frac{q(j)}{P_\lambda(j)} K_{x_j} \otimes K_{x_j}.$$

Now, considering that  $\frac{q(j)}{P_\lambda(j)} > 0$  for any  $j \in J$ , thus  $\text{ran } S_n^* H S_n = \mathcal{H}_m$ . Therefore, by using Prop. 3 and 7, we exploit the fact that the range of  $P_m$  is the same of  $S_n^* H S_n$ , to obtain

$$\|(I - P_m)(C + \lambda I)^{1/2}\|^2 \leq \lambda \|(S_n^* H S_n + \lambda I)^{-1/2}C_\lambda^{1/2}\|^2 \leq \frac{\lambda}{1 - \beta(\lambda)},$$

with  $\beta(\lambda) = \lambda_{\max} \left( C_\lambda^{-1/2}(C - S_n^* H S_n)C_\lambda^{-1/2} \right)$ . Considering that the function  $(1 - x)^{-1}$  is increasing on  $-\infty < x < 1$ , in order to bound  $\lambda/(1 - \beta(\lambda))$  we need an upperbound for  $\beta(\lambda)$ . Here we split  $\beta(\lambda)$  in the following way,

$$\beta(\lambda) \leq \underbrace{\lambda_{\max} \left( C_\lambda^{-1/2}(C - C_n)C_\lambda^{-1/2} \right)}_{\beta_1(\lambda)} + \underbrace{\lambda_{\max} \left( C_\lambda^{-1/2}(C_n - S_n^* H S_n)C_\lambda^{-1/2} \right)}_{\beta_2(\lambda)}.$$

Considering that  $C_n$  is the linear combination of independent random vectors, for the first term we can apply Prop. 8, obtaining a bound of the form

$$\beta_1(\lambda) \leq \frac{2w}{3n} + \sqrt{\frac{2w\kappa^2}{\lambda n}},$$

with probability  $1 - \tau$ , where  $w = \log \frac{4\kappa^2}{\lambda\tau}$  (we used the fact that  $\mathcal{N}_\infty(\lambda) \leq \kappa^2/\lambda$ ). Then, after dividing and multiplying by  $C_{n\lambda}^{1/2}$ , we split the second term  $\beta_2(\lambda)$  as follows:

$$\begin{aligned} \beta_2(\lambda) &\leq \|C_\lambda^{-1/2}(C_n - S_n^* H S_n)C_\lambda^{-1/2}\| \\ &\leq \|C_\lambda^{-1/2}C_{n\lambda}^{1/2}C_{n\lambda}^{-1/2}(C_n - S_n^* H S_n)C_{n\lambda}^{-1/2}C_{n\lambda}^{1/2}C_\lambda^{-1/2}\| \\ &\leq \|C_\lambda^{-1/2}C_{n\lambda}^{1/2}\|^2 \|C_{n\lambda}^{-1/2}(C_n - S_n^* H S_n)C_{n\lambda}^{-1/2}\|. \end{aligned}$$

Let

$$\beta_3(\lambda) = \|C_{n\lambda}^{-1/2}(C_n - S_n^* H S_n)C_{n\lambda}^{-1/2}\| = \|C_{n\lambda}^{-1/2}S_n^*(I - H)S_nC_{n\lambda}^{-1/2}\|. \quad (20)$$

Note that  $S_nC_{n\lambda}^{-1}S_n^* = K_n(K_n + \lambda nI)^{-1}$  indeed  $C_{n\lambda}^{-1} = (S_n^*S_n + \lambda I)^{-1}$  and  $K_n = nS_nS_n^*$ . Therefore we have

$$S_nC_{n\lambda}^{-1}S_n^* = S_n(S_n^*S_n + \lambda I)^{-1}S_n^* = (S_nS_n^* + \lambda I)^{-1}S_nS_n^* = (K_n + \lambda nI)^{-1}K_n.$$

Thus, if we let  $U\Sigma U^\top$  be the eigendecomposition of  $K_n$ , we have that  $(K_n + \lambda nI)^{-1}K_n = U(\Sigma + \lambda nI)^{-1}\Sigma U^\top$  and thus  $S_nC_{n\lambda}^{-1}S_n^* = U(\Sigma + \lambda nI)^{-1}\Sigma U^\top$ . In particular this implies that  $S_nC_{n\lambda}^{-1}S_n^* = UQ_n^{1/2}Q_n^{1/2}U^\top$  with  $Q_n = (\Sigma + \lambda nI)^{-1}\Sigma$ . Therefore we have

$$\beta_3(\lambda) = \|C_{n\lambda}^{-1/2}S_n^*(I - H)S_nC_{n\lambda}^{-1/2}\| = \|Q_n^{1/2}U^\top(I - H)UQ_n^{1/2}\|,$$

where we used twice the fact that  $\|ABA^*\| = \|(A^*A)^{1/2}B(A^*A)^{1/2}\|$  for any bounded linear operators  $A, B$ .

Consider the matrix  $A = Q_n^{1/2}U^\top$  and let  $a_i$  be the  $i$ -th column of  $A$ , and  $e_i$  be the  $i$ -th canonical basis vector for each  $i \in N$ . We prove that  $\|a_i\|^2 = l_i(\lambda)$ , the true leverage score, since

$$\|a_i\|^2 = \|Q_n^{1/2}U^\top e_i\|^2 = e_i^\top UQ_nU^\top e_i = ((K_n + \lambda nI)^{-1}K_n)_{ii} = l_i(\lambda).$$

Noting that  $\sum_{k=1}^n \frac{q(k)}{P_\lambda(k)} a_k a_k^\top = \sum_{i \in \mathcal{I}} \frac{1}{P_\lambda(i)} a_i a_i^\top$ , we have

$$\beta_3(\lambda) = \|AA^\top - \frac{1}{m} \sum_{i \in \mathcal{I}} \frac{1}{P_\lambda(i)} a_i a_i^\top\|.$$

Moreover, by the  $T$ -approximation property of the approximate leverage scores (see Def. 1), we have that for all  $i \in \{1, \dots, n\}$ , when  $\lambda \geq \lambda_0$ , the following holds with probability  $1 - \delta$

$$P_\lambda(i) = \frac{\hat{l}_i(\lambda)}{\sum_j \hat{l}_j(\lambda)} \geq T^{-2} \frac{l_i(\lambda)}{\sum_j l_j(\lambda)} = T^{-2} \frac{\|a_i\|^2}{\text{Tr} AA^\top}.$$

Then, we can apply Prop. 9, so that, after a union bound, we obtain the following inequality with probability  $1 - \delta - \tau$ :

$$\beta_3(\lambda) \leq \frac{2\|A\|^2 \log \frac{2n}{\tau}}{3m} + \sqrt{\frac{2\|A\|^2 T^2 \text{Tr} AA^\top \log \frac{2n}{\tau}}{m}} \leq \frac{2 \log \frac{2n}{\tau}}{3m} + \sqrt{\frac{2T^2 \hat{\mathcal{N}}(\lambda) \log \frac{2n}{\tau}}{m}},$$

where the last step follows from  $\|A\|^2 = \|(K_n + \lambda nI)^{-1}K_n\| \leq 1$  and  $\text{Tr}(AA^\top) = \text{Tr}(C_{n\lambda}^{-1}C_n) := \hat{\mathcal{N}}(\lambda)$ . Applying Proposition 1, we have that  $\hat{\mathcal{N}}(\lambda) \leq 1.3\mathcal{N}(\lambda)$  with probability  $1 - \tau$ , when  $\frac{19\kappa^2}{n} \log \frac{n}{4\tau} \leq \lambda \leq \|C\|$  and  $n \geq 405\kappa^2 \vee 67\kappa^2 \log \frac{\kappa^2}{2\tau}$ . Thus, by taking a union bound again, we have

$$\beta_3(\lambda) \leq \frac{2 \log \frac{2n}{\tau}}{3m} + \sqrt{\frac{5.3T^2 \mathcal{N}(\lambda) \log \frac{2n}{\tau}}{m}},$$

with probability  $1 - 2\tau - \delta$  when  $\lambda_0 \vee \frac{19\kappa^2}{n} \log \frac{n}{\delta} \leq \lambda \leq \|C\|$  and  $n \geq 405\kappa^2 \vee 67\kappa^2 \log \frac{2\kappa^2}{\delta}$ . The last step is to bound  $\|C_\lambda^{-1/2} C_{n\lambda}^{1/2}\|^2$ , as follows

$$\|C_\lambda^{-1/2} C_{n\lambda}^{1/2}\|^2 = \|C_\lambda^{-1/2} C_{n\lambda} C_\lambda^{-1/2}\| = \|I + C_\lambda^{-1/2} (C_n - C) C_\lambda^{-1/2}\| \leq 1 + \eta,$$

with  $\eta = \|C_\lambda^{-1/2} (C_n - C) C_\lambda^{-1/2}\|$ . Note that, by applying Prop. 8 we have that  $\eta \leq \frac{2(\kappa^2 + \lambda)\theta}{3\lambda n} + \sqrt{\frac{2\kappa^2\theta}{3\lambda n}}$  with probability  $1 - \tau$  and  $\theta = \log \frac{8\kappa^2}{\lambda\tau}$ . Finally, by collecting the above results and taking a union bound we have

$$\beta(\lambda) \leq \frac{2w}{3n} + \sqrt{\frac{2w\kappa^2}{\lambda n}} + (1 + \eta) \left( \frac{2 \log \frac{2n}{\tau}}{3m} + \sqrt{\frac{5.3T^2 \mathcal{N}(\lambda) \log \frac{2n}{\tau}}{m}} \right),$$

with probability  $1 - 4\tau - \delta = 1 - 2\delta$  when  $\lambda_0 \vee \frac{19\kappa^2}{n} \log \frac{n}{\delta} \leq \lambda \leq \|C\|$  and  $n \geq 405\kappa^2 \vee 67\kappa^2 \log \frac{2\kappa^2}{\delta}$ . Note that, if we select  $n \geq 405\kappa^2 \vee 223\kappa^2 \log \frac{2\kappa^2}{\delta}$ ,  $m \geq 334 \log \frac{8n}{\delta}$ ,  $\lambda_0 \vee \frac{19\kappa^2}{n} \log \frac{2n}{\delta} \leq \lambda \leq \|C\|$  and  $\frac{78T^2 \mathcal{N}(\lambda) \log \frac{8n}{\delta}}{m} \leq 1$  the conditions are satisfied and we have  $\beta(\lambda) \leq 2/3$ , so that

$$\|(I - P_m)C^{1/2}\|^2 \leq 3\lambda,$$

with probability  $1 - 2\delta$ . □

**Proposition 1** (Empirical Effective Dimension). *Let  $\hat{\mathcal{N}}(\lambda) = \text{Tr } C_n C_{n\lambda}^{-1}$ . Under the Assumption 3, for any  $\delta > 0$  and  $n \geq 405\kappa^2 \vee 67\kappa^2 \log \frac{6\kappa^2}{\delta}$ , if  $\frac{19\kappa^2}{n} \log \frac{n}{4\delta} \leq \lambda \leq \|C\|$ , then the following holds with probability  $1 - \delta$ ,*

$$\frac{|\hat{\mathcal{N}}(\lambda) - \mathcal{N}(\lambda)|}{\mathcal{N}(\lambda)} \leq 4.5q + (1 + 9q) \sqrt{\frac{3q}{\mathcal{N}(\lambda)}} + \frac{q + 13.5q^2}{\mathcal{N}(\lambda)} \leq 1.65,$$

with  $q = \frac{4\kappa^2 \log \frac{6}{\delta}}{3\lambda n}$ .

*Proof.* Let  $\tau = \delta/3$ . Define  $B_n = C_\lambda^{-1/2} (C - C_n) C_\lambda^{-1/2}$ . Choosing  $\lambda$  in the range  $\frac{19\kappa^2}{n} \log \frac{n}{4\tau} \leq \lambda \leq \|C\|$ , Prop. 8 assures that  $\lambda_{\max}(B_n) \leq 1/3$  with probability  $1 - \tau$ . Then, using the fact that  $C_{n\lambda}^{-1} = C_\lambda^{-1/2} (I - B_n)^{-1} C_\lambda^{-1/2}$  (see the proof of Prop. 7) we have

$$\begin{aligned} |\hat{\mathcal{N}}(\lambda) - \mathcal{N}(\lambda)| &= |\text{Tr } C_{n\lambda}^{-1} C_n - C C_\lambda^{-1}| = \lambda |\text{Tr } C_{n\lambda}^{-1} (C_n - C) C_\lambda^{-1}| \\ &= |\lambda \text{Tr } C_\lambda^{-1/2} (I - B_n)^{-1} C_\lambda^{-1/2} (C_n - C) C_\lambda^{-1/2} C_\lambda^{-1/2}| \\ &= |\lambda \text{Tr } C_\lambda^{-1/2} (I - B_n)^{-1} B_n C_\lambda^{-1/2}|. \end{aligned}$$

Considering that for any symmetric linear operator  $X : \mathcal{H} \rightarrow \mathcal{H}$  the following identity holds

$$(I - X)^{-1} X = X + X(I - X)^{-1} X,$$

when  $\lambda_{\max}(X) \leq 1$ , we have

$$\begin{aligned} \lambda |\text{Tr } C_\lambda^{-1/2} (I - B_n)^{-1} B_n C_\lambda^{-1/2}| &\leq \underbrace{\lambda |\text{Tr } C_\lambda^{-1/2} B_n C_\lambda^{-1/2}|}_A \\ &\quad + \underbrace{\lambda |\text{Tr } C_\lambda^{-1/2} B_n (I - B_n)^{-1} B_n C_\lambda^{-1/2}|}_B. \end{aligned}$$

To find an upperbound for  $A$  define the i.i.d. random variables  $\eta_i = \langle K_{x_i}, \lambda C_\lambda^{-2} K_{x_i} \rangle \in \mathbb{R}$  with  $i \in \{1, \dots, n\}$ . By linearity of the trace and the expectation, we have  $M = \mathbb{E} \eta_1 = \mathbb{E} \langle K_{x_i}, \lambda C_\lambda^{-2} K_{x_i} \rangle = \mathbb{E} \text{Tr}(\lambda C_\lambda^{-2} K_{x_1} \otimes K_{x_1}) = \lambda \text{Tr}(C_\lambda^{-2} C)$ . Therefore,

$$\lambda |\text{Tr } C_\lambda^{-1/2} B_n C_\lambda^{-1/2}| = \left| M - \frac{1}{n} \sum_{i=1}^n \eta_i \right|,$$

and we can apply the Bernstein inequality (Prop. 10) with

$$|M - \eta_1| \leq \lambda \|C_\lambda^{-2}\| \|K_{x_1}\|^2 + M \leq \frac{\kappa^2}{\lambda} + M \leq \frac{2\kappa^2}{\lambda} = L,$$

$$\mathbb{E}(\eta_1 - M)^2 = \mathbb{E}\eta_1^2 - M^2 \leq \mathbb{E}\eta_1^2 \leq LM = \sigma^2.$$

An upperbound for  $M$  is  $M = \text{Tr}(\lambda C_\lambda^{-2} C) = \text{Tr}((I - C_\lambda^{-1} C) C_\lambda^{-1} C) \leq \mathcal{N}(\lambda)$ . Thus, we have

$$\lambda |\text{Tr} C_\lambda^{-1/2} B_n C_\lambda^{-1/2}| \leq \frac{4\kappa^2 \log \frac{2}{\tau}}{3\lambda n} + \sqrt{\frac{4\kappa^2 \mathcal{N}(\lambda) \log \frac{2}{\tau}}{\lambda n}},$$

with probability  $1 - \tau$ .

To find an upperbound for  $B$ , let  $\mathcal{L}$  be the space of Hilbert-Schmidt operators on  $\mathcal{H}$ .  $\mathcal{L}$  is a Hilbert space with scalar product  $\langle U, V \rangle_{HS} = \text{Tr}(UV^*)$  for all  $U, V \in \mathcal{L}$ . Next, note that  $B = \|Q\|_{HS}^2$  where  $Q = \lambda^{1/2} C_\lambda^{-1/2} B_n (I - B_n)^{-1/2}$ , moreover

$$\|Q\|_{HS}^2 \leq \|\lambda^{1/2} C_\lambda^{-1/2}\|^2 \|B_n\|_{HS}^2 \|(I - B_n)^{-1/2}\|^2 \leq 1.5 \|B_n\|_{HS}^2,$$

since  $\|(I - B_n)^{-1/2}\|^2 = (1 - \lambda_{\max}(B_n))^{-1} \leq 3/2$  and  $(1 - \sigma)^{-1}$  is increasing and positive on  $[-\infty, 1)$ .

To find a bound for  $\|B_n\|_{HS}$  consider that  $B_n = T - \frac{1}{n} \sum_{i=1}^n \zeta_i$  where  $\zeta_i$  are i.i.d. random operators defined as  $\zeta_i = C_\lambda^{-1/2} (K_{x_i} \otimes K_{x_i}) C_\lambda^{-1/2} \in \mathcal{L}$  for all  $i \in \{1, \dots, n\}$ , and  $T = \mathbb{E}\zeta_1 = C_\lambda^{-1} C \in \mathcal{L}$ . Then we can apply the Bernstein's inequality for random vectors on a Hilbert space (Prop. 11), with the following  $L$  and  $\sigma^2$ :

$$\|T - \zeta_1\|_{HS} \leq \|C_\lambda^{-1/2}\|^2 \|K_{x_1}\|_{\mathcal{H}}^2 + \|T\|_{HS} \leq \frac{\kappa^2}{\lambda} + \|T\|_{HS} \leq \frac{2\kappa^2}{\lambda} = L,$$

$$\mathbb{E}\|\zeta_1 - T\|^2 = \mathbb{E}\text{Tr}(\zeta_1^2 - T^2) \leq \mathbb{E}\text{Tr}(\zeta_1^2) \leq L \mathbb{E}\text{Tr}(\zeta_1) = \sigma^2,$$

where  $\|T\|_{HS} \leq \mathbb{E}\text{Tr}(\zeta_1) = \mathcal{N}(\lambda)$ , obtaining

$$\|B_n\|_{HS} \leq \frac{4\kappa^2 \log \frac{2}{\tau}}{\lambda n} + \sqrt{\frac{4\kappa^2 \mathcal{N}(\lambda) \log \frac{2}{\tau}}{\lambda n}},$$

with probability  $1 - \tau$ . Then, by taking a union bound for the three events we have

$$|\hat{\mathcal{N}}(\lambda) - \mathcal{N}(\lambda)| \leq q + \sqrt{3q\mathcal{N}(\lambda)} + 1.5 \left( 3q + \sqrt{3q\mathcal{N}(\lambda)} \right)^2,$$

with  $q = \frac{4\kappa^2 \log \frac{6}{\delta}}{3\lambda n}$ , and with probability  $1 - \delta$ . Finally, if the second assumption on  $\lambda$  holds, then we have  $q \leq 4/57$ . Noting that  $n \geq 405\kappa^2$ , and that  $\mathcal{N}(\lambda) \geq \|CC_\lambda^{-1}\| = \frac{\|C\|}{\|C\| + \lambda} \geq 1/2$ , we have that

$$|\hat{\mathcal{N}}(\lambda) - \mathcal{N}(\lambda)| \leq \left( \frac{q}{3\mathcal{N}(\lambda)} + \sqrt{\frac{q}{\mathcal{N}(\lambda)}} + 1.5 \left( \frac{q}{\sqrt{\mathcal{N}(\lambda)}} + \sqrt{q} \right)^2 \right) \mathcal{N}(\lambda) \leq 1.65\mathcal{N}(\lambda).$$

□

## E Proofs of main theorem

A key step to derive the proof of Theorem 1 is the error decomposition given by the following theorem, together with the probabilistic inequalities in the previous section.

**Theorem 2** (Error decomposition for KRLS+Ny). *Under Assumptions 1, 3, 4, let  $v = \min(s, 1/2)$  and  $\hat{f}_{\lambda, m}$  a KRLS + generalized Nyström solution as in Eq. (18). Then for any  $\lambda, m > 0$  the error is bounded by*

$$\left| \mathcal{E}(\hat{f}_{\lambda, m}) - \mathcal{E}(f_{\mathcal{H}}) \right|^{1/2} \leq q \underbrace{(\mathcal{S}(\lambda, n))}_{\text{Sample error}} + \underbrace{\mathcal{C}(m)^{1/2+v}}_{\text{Computational error}} + \underbrace{\lambda^{1/2+v}}_{\text{Approximation error}}, \quad (21)$$

where  $\mathcal{S}(\lambda, n) = \|(C + \lambda I)^{-1/2} (S_n^* \hat{y}_n - C_n f_{\mathcal{H}})\|$  and  $\mathcal{C}(m) = \|(I - P_m)(C + \lambda I)^{1/2}\|^2$  with  $P_m = Z_m^* (Z_m Z_m^*)^\dagger Z_m$ . Moreover  $q = R(\beta^2 \vee (1 + \theta\beta))$ ,  $\beta = \|(C_n + \lambda I)^{-1/2} (C + \lambda I)^{1/2}\|$ ,  $\theta = \|(C_n + \lambda I)^{1/2} (C + \lambda I)^{-1/2}\|$ .



*Proof.* Let  $C_\lambda = C + \lambda I$  and  $C_{n\lambda} = C_n + \lambda I$  for any  $\lambda > 0$ . Let  $\hat{f}_{\lambda,m}$  as in Eq. (18). By Lemma 1, Lemma 2 and Lemma 3 we know that  $\hat{f}_{\lambda,m}$  is characterized by  $\hat{f}_{\lambda,m} = g_{\lambda,m}(C_n)S_n^*\hat{y}_n$  with  $g_{\lambda,m}(C_n) = V(V^*C_nV + \lambda I)^{-1}V^*$ . By using the fact that  $\mathcal{E}(f) - \mathcal{E}(f_{\mathcal{H}}) = \|C^{1/2}(f - f_{\mathcal{H}})\|_{\mathcal{H}}^2$  for any  $f \in \mathcal{H}$  (see Prop. 1 Point 3 of [7]), we have

$$\begin{aligned} |\mathcal{E}(\hat{f}_{\lambda,m}) - \mathcal{E}(f_{\mathcal{H}})|^{1/2} &= \|C^{1/2}(\hat{f}_{\lambda,m} - f_{\mathcal{H}})\|_{\mathcal{H}} = \|C^{1/2}(g_{\lambda,m}(C_n)S_n^*\hat{y}_n - f_{\mathcal{H}})\|_{\mathcal{H}} \\ &= \|C^{1/2}(g_{\lambda,m}(C_n)S_n^*(\hat{y}_n - S_nf_{\mathcal{H}} + S_nf_{\mathcal{H}}) - f_{\mathcal{H}})\|_{\mathcal{H}} \\ &\leq \underbrace{\|C^{1/2}g_{\lambda,m}(C_n)S_n^*(\hat{y}_n - S_nf_{\mathcal{H}})\|_{\mathcal{H}}}_A + \underbrace{\|C^{1/2}(I - g_{\lambda,m}(C_n)C_n)f_{\mathcal{H}}\|_{\mathcal{H}}}_B. \end{aligned}$$

**Bound for the term A** Multiplying and dividing by  $C_{n\lambda}^{1/2}$  and  $C_\lambda^{1/2}$  we have

$$A \leq \|C^{1/2}C_{n\lambda}^{-1/2}\| \|C_{n\lambda}^{1/2}g_{\lambda,m}(C_n)C_{n\lambda}^{1/2}\| \|C_{n\lambda}^{-1/2}C_\lambda^{1/2}\| \|C_\lambda^{-1/2}S_n^*(\hat{y}_n - S_nf_{\mathcal{H}})\|_{\mathcal{H}} \leq \beta^2 \mathcal{S}(\lambda, n),$$

where the last step is due to Lemma 8 and the fact that

$$\|C^{1/2}C_{n\lambda}^{-1/2}\| \leq \|C^{1/2}C_\lambda^{-1/2}\| \|C_\lambda^{1/2}C_{n\lambda}^{-1/2}\| \leq \|C_\lambda^{1/2}C_{n\lambda}^{-1/2}\|.$$

**Bound for the term B** Noting that  $g_{\lambda,m}(C_n)C_{n\lambda}VV^* = VV^*$ , we have

$$\begin{aligned} I - g_{\lambda,m}(C_n)C_n &= I - g_{\lambda,m}(C_n)C_{n\lambda} + \lambda g_{\lambda,m}(C_n) \\ &= I - g_{\lambda,m}(C_n)C_{n\lambda}VV^* - g_{\lambda,m}(C_n)C_{n\lambda}(I - VV^*) + \lambda g_{\lambda,m}(C_n) \\ &= (I - VV^*) + \lambda g_{\lambda,m}(C_n) - g_{\lambda,m}(C_n)C_{n\lambda}(I - VV^*). \end{aligned}$$

Therefore, noting that by Ass. 4 we have  $\|C_\lambda^{-v}f_{\mathcal{H}}\|_{\mathcal{H}} \leq \|C_\lambda^{-s}f_{\mathcal{H}}\|_{\mathcal{H}} \leq \|C^{-s}f_{\mathcal{H}}\|_{\mathcal{H}} \leq R$ , then, by reasoning as in A, we have

$$\begin{aligned} B &\leq \|C^{1/2}(I - g_{\lambda,m}(C_n)C_n)C_\lambda^v\| \|C_\lambda^{-v}f_{\mathcal{H}}\|_{\mathcal{H}} \\ &\leq R\|C^{1/2}C_\lambda^{-1/2}\| \|C_\lambda^{1/2}(I - VV^*)C_\lambda^v\| + R\lambda\|C^{1/2}C_{n\lambda}^{-1/2}\| \|C_{n\lambda}^{1/2}g_{\lambda,m}(C_n)C_\lambda^v\| \\ &\quad + R\|C^{1/2}C_{n\lambda}^{-1/2}\| \|C_{n\lambda}^{1/2}g_{\lambda,m}(C_n)C_{n\lambda}^{1/2}\| \|C_{n\lambda}^{1/2}C_\lambda^{-1/2}\| \|C_\lambda^{1/2}(I - VV^*)C_\lambda^v\| \\ &\leq R(1 + \beta\theta) \underbrace{\|C_\lambda^{1/2}(I - VV^*)C_\lambda^v\|}_{B.1} + R\beta\lambda \underbrace{\|C_{n\lambda}^{1/2}g_{\lambda,m}(C_n)C_\lambda^v\|}_{B.2}, \end{aligned}$$

where in the second step we applied the decomposition of  $I - g_{\lambda,m}(C_n)C_n$ .

**Bound for the term B.1** Since  $VV^*$  is a projection operator, we have that  $(I - VV^*) = (I - VV^*)^s$ , for any  $s > 0$ , therefore

$$B.1 = \|C_\lambda^{1/2}(I - VV^*)^2C_\lambda^v\| \leq \|C_\lambda^{1/2}(I - VV^*)\| \|(I - VV^*)C_\lambda^v\|.$$

By applying Cordes inequality (Prop. 4) to  $\|(I - VV^*)C_\lambda^v\|$  we have,

$$\|(I - VV^*)C_\lambda^v\| = \|(I - VV^*)^{2v}C_\lambda^{\frac{1}{2}2v}\| = \|(I - VV^*)C_\lambda^{1/2}\|^{2v}.$$

**Bound for the term B.2** We have

$$\begin{aligned} B.2 &\leq \lambda\|C_{n\lambda}^{1/2}g_{\lambda,m}(C_n)C_{n\lambda}^v\| \|C_{n\lambda}^{-v}C_\lambda^v\| \\ &\leq \lambda\|C_{n\lambda}^{1/2}g_{\lambda,m}(C_n)C_{n\lambda}^v\| \|C_{n\lambda}^{-1/2}C_\lambda^{1/2}\|^{2v} \\ &\leq \beta^{2v}\lambda\|(V^*C_{n\lambda}V)^{1/2}(V^*C_{n\lambda}V)^{-1}(V^*C_{n\lambda}V)^v\| \\ &= \beta^{2v}\lambda\|(V^*C_nV + \lambda I)^{-(1/2-v)}\| \leq \beta\lambda^{1/2+v}, \end{aligned}$$

where the first step is obtained multipling and dividing by  $C_{n\lambda}^v$ , the second step by applying Cordes inequality (see Prop. 4), the third step by Prop. 6.  $\square$

**Proposition 2** (Bounds for plain and ALS Nyström). *For any  $\delta > 0$ , let  $n \geq 1655\kappa^2 + 223\kappa^2 \log \frac{6\kappa^2}{\delta}$ , let  $\frac{19\kappa^2}{n} \log \frac{6n}{\delta} \leq \lambda \leq \|C\|$  and define*

$$\begin{aligned} C_{\text{pl}}(m) &= \min \left\{ t > 0 \mid (67 \vee 5\mathcal{N}_\infty(t)) \log \frac{12\kappa^2}{t\delta} \leq m \right\}, \\ C_{\text{ALS}}(m) &= \min \left\{ \frac{19\kappa^2}{n} \log \frac{12n}{\delta} \leq t \leq \|C\| \mid 78T^2\mathcal{N}(t) \log \frac{48n}{\delta} \leq m \right\}. \end{aligned}$$

*Under the assumptions of Thm. 2 and Assumption 2, 3, if one of the following two conditions hold*

1. plain Nyström is used,

2. ALS Nyström is used with

- (a)  $T$ -approximate leverage scores, for any  $t \geq \frac{19\kappa^2}{n} \log \frac{12n}{\delta}$  (see Def. 1),
- (b) resampling probabilities  $P_t$  where  $t = \mathcal{C}_{\text{ALS}}(m)$  (see Sect. 2),
- (c)  $m \geq 334 \log \frac{48n}{\delta}$ ,

then the following holds with probability  $1 - \delta$

$$\left| \mathcal{E}(\hat{f}_{\lambda, m}) - \mathcal{E}(f_{\mathcal{H}}) \right|^{1/2} \leq 6R \left( \frac{M\sqrt{\mathcal{N}_{\infty}(\lambda)}}{n} + \sqrt{\frac{\sigma^2 \mathcal{N}(\lambda)}{n}} \right) \log \frac{6}{\delta} + 3R\mathcal{C}(m)^{1/2+v} + 3R\lambda^{1/2+v} \quad (22)$$

where  $\mathcal{C}(m) = \mathcal{C}_{\text{pl}}(m)$  in case of plain Nyström and  $\mathcal{C}(m) = \mathcal{C}_{\text{ALS}}(m)$  in case of ALS Nyström.

*Proof.* In order to get explicit bounds from Thm. 2, we have to control four quantities that are  $\beta, \theta, \mathcal{S}(\lambda, n)$  and  $\mathcal{C}(m)$ . In the following we bound such quantities in probability and then take a union bound. Let  $\tau = \delta/3$ . We can control both  $\beta$  and  $\theta$ , by bounding  $b(\lambda) = \|C_{\lambda}^{-1/2}(C_n - C)C_{\lambda}^{-1/2}\|$ . Indeed, by Prop. 7, we have that  $\beta \leq 1/(1 - b(\lambda))$ , while

$$\theta^2 = \|C_{\lambda}^{-1/2}C_n C_{\lambda}^{-1/2}\| = \|I + C_{\lambda}^{-1/2}(C_n - C)C_{\lambda}^{-1/2}\| \leq 1 + b(\lambda).$$

Exploiting Prop. 8, with the fact that  $\mathcal{N}(\lambda) \leq \mathcal{N}_{\infty}(\lambda) \leq \frac{\kappa^2}{\lambda}$  and  $\text{Tr } C \leq \kappa^2$ , we have that  $b(\lambda) \leq \frac{2(\kappa^2 + \lambda)w}{3\lambda n} + \sqrt{\frac{2w\kappa^2}{\lambda n}}$  for  $w = \log \frac{4\kappa^2}{\tau\lambda}$  with probability  $1 - \tau$ . Simple computations show that with  $n$  and  $\lambda$  as in the statement of this corollary, we have  $b(\lambda) \leq 1/3$ . Therefore  $\beta \leq 1.5$ , while  $\theta \leq 1.16$  and  $q = R(\beta^2 \vee (1 + \theta\beta)) < 2.75R$  with probability  $1 - \tau$ . Next, we bound  $\mathcal{S}(\lambda, n)$ . Here we exploit Lemma 4 which gives, with probability  $1 - \tau$ ,

$$\mathcal{S}(\lambda, n) \leq 2 \left( \frac{M\sqrt{\mathcal{N}_{\infty}(\lambda)}}{n} + \sqrt{\frac{\sigma^2 \mathcal{N}(\lambda)}{n}} \right) \log \frac{2}{\tau}.$$

To bound  $\mathcal{C}(m)$  for plain Nyström, Lemma 6 gives  $\mathcal{C}(m) \leq 3t$  with probability  $1 - \tau$ , for a  $t > 0$  such that  $(67 \vee 5\mathcal{N}_{\infty}(t)) \log \frac{4\kappa^2}{t\tau} \leq m$ . In particular, we choose  $t = \mathcal{C}_{\text{pl}}(m)$  to satisfy the condition. Next we bound  $\mathcal{C}(m)$  for ALS Nyström. Using Lemma 7 with  $\lambda_0 = \frac{19\kappa^2}{n} \log \frac{2n}{\tau}$ , we have  $\mathcal{C}(m) \leq 3t$  with probability  $1 - \tau$  under some conditions on  $t, m, n$ , on the approximate leverage scores and on the resampling probability. Here again the requirement on  $n$  is satisfied by the hypothesis on  $n$  of this proposition, while the condition on the approximate leverage scores and on the resampling probabilities are satisfied by conditions (a), (b) of this proposition. The remaining two conditions are  $\frac{19\kappa^2}{n} \log \frac{4n}{\tau} \leq t \leq \|C\|$  and  $(334 \vee 78T^2\mathcal{N}(t)) \log \frac{16n}{\tau} \leq m$ . They are satisfied by choosing  $t = \mathcal{C}_{\text{ALS}}(m)$  and by assuming that  $m \geq 334 \log \frac{16n}{\tau}$ . Finally, the proposition is obtained by substituting each of the four quantities  $\beta, \theta, \mathcal{S}(\lambda, n), \mathcal{C}(m)$  with the corresponding upperbounds in Eq. (21), and by taking the union bounds on the associated events.  $\square$

*Proof of Theorem 1.* By exploiting the results of Prop. 2, obtained from the error decomposition of Thm. 2 we have that

$$\left| \mathcal{E}(\hat{f}_{\lambda, m}) - \mathcal{E}(f_{\mathcal{H}}) \right|^{1/2} \leq 6R \left( \frac{M\sqrt{\mathcal{N}_{\infty}(\lambda)}}{n} + \sqrt{\frac{\sigma^2 \mathcal{N}(\lambda)}{n}} \right) \log \frac{6}{\delta} + 3R\mathcal{C}(m)^{1/2+v} + 3R\lambda^{1/2+v} \quad (23)$$

with probability  $1 - \delta$ , under conditions on  $\lambda, m, n$ , on the resampling probabilities and on the approximate leverage scores. The last is satisfied by condition (a) in this theorem. The conditions on  $\lambda, n$  are  $n \geq 1655\kappa^2 + 223\kappa^2 \log \frac{6\kappa^2}{\delta}$  and  $\frac{19\kappa^2}{n} \log \frac{12n}{\delta} \leq \lambda \leq \|C\|$ . If we assume that  $n \geq 1655\kappa^2 + 223\kappa^2 \log \frac{6\kappa^2}{\delta} + \left( \frac{38p}{\|C\|} \log \frac{114\kappa^2 p}{\|C\|\delta} \right)^p$  we satisfy the condition on  $n$  and at the same time we are sure that  $\lambda = \|C\|n^{-1/(2v+\gamma+1)}$  satisfies the condition on  $\lambda$ . In the plain Nyström case,

if we assume that  $m \geq 67 \log \frac{12\kappa^2}{\lambda\delta} + 5\mathcal{N}_\infty(\lambda) \log \frac{12\kappa^2}{\lambda\delta}$ , then  $\mathcal{C}(m) = \mathcal{C}_{\text{pl}}(m) \leq \lambda$ . In the ALS Nyström case, if we assume that  $m \geq (334 \vee 78T^2\mathcal{N}(\lambda)) \log \frac{48n}{\delta}$  the condition on  $m$  is satisfied, then  $\mathcal{C}(m) = \mathcal{C}_{\text{ALS}}(m) \leq \lambda$ , moreover the conditions on the resampling probabilities is satisfied by condition (b) of this theorem. Therefore, by setting  $\lambda = \|C\|n^{-1/(2v+\gamma+1)}$  in Eq. (23) and considering that  $\mathcal{N}_\infty(\lambda) \leq \kappa^2\lambda^{-1}$  we easily obtain the result of this theorem.  $\square$

The following lemma is a technical result needed in the error decomposition (Thm. 2).

**Lemma 8.** *For any  $\lambda > 0$ , let  $V$  be such that  $V^*V = I$  and  $C_n$  be a positive self-adjoint operator. Then, the following holds,*

$$\|(C_n + \lambda I)^{1/2}V(V^*C_nV + \lambda I)^{-1}V^*(C_n + \lambda I)^{1/2}\| \leq 1.$$

*Proof.* Let  $C_{n\lambda} = C_n + \lambda I$  and  $g_{\lambda m}(C_n) = V(V^*C_nV + \lambda I)^{-1}V^*$ , then

$$\begin{aligned} \|C_{n\lambda}^{1/2}g_{\lambda m}(C_n)C_{n\lambda}^{1/2}\|^2 &= \|C_{n\lambda}^{1/2}g_{\lambda m}(C_n)C_{n\lambda}g_{\lambda m}(C_n)C_{n\lambda}^{1/2}\| \\ &= \|C_{n\lambda}^{1/2}V(V^*C_{n\lambda}V)^{-1}(V^*C_{n\lambda}V)(V^*C_{n\lambda}V)^{-1}V^*C_{n\lambda}^{1/2}\| \\ &= \|C_{n\lambda}^{1/2}g_{\lambda m}(C_n)C_{n\lambda}^{1/2}\|, \end{aligned}$$

and therefore the only possible values for  $\|C_{n\lambda}^{1/2}g_{\lambda m}(C_n)C_{n\lambda}^{1/2}\|$  are 0 or 1.  $\square$

## F Auxiliary results

**Proposition 3.** *Let  $\mathcal{H}, \mathcal{K}, \mathcal{F}$  three separable Hilbert spaces, let  $Z : \mathcal{H} \rightarrow \mathcal{K}$  be a bounded linear operator and let  $W$  be a projection operator on  $\mathcal{H}$  such that  $\text{ran } P = \text{ran } Z^*$ . Then for any bounded linear operator  $F : \mathcal{F} \rightarrow \mathcal{H}$  and any  $\lambda > 0$  we have*

$$\|(I - P)X\| \leq \lambda^{1/2}\|(Z^*Z + \lambda I)^{-1/2}X\|.$$

*Proof.* First of all note that  $\lambda(Z^*Z + \lambda I)^{-1} = I - Z^*(ZZ^* + \lambda I)^{-1}Z$ , that  $Z = ZP$  and that  $\|Z^*(ZZ^* + \lambda I)^{-1}Z\| \leq 1$  for any  $\lambda > 0$ . Then for any  $v \in \mathcal{H}$  we have

$$\begin{aligned} \langle v, Z^*(ZZ^* + \lambda I)^{-1}Zv \rangle &= \langle v, PZ^*(ZZ^* + \lambda I)^{-1}ZPv \rangle = \|(ZZ^* + \lambda I)^{-1/2}ZPv\|^2 \\ &\leq \|(ZZ^* + \lambda I)^{-1/2}Z\|^2\|Pv\|^2 \leq \|Pv\|^2 = \langle v, Pv \rangle \end{aligned}$$

therefore  $P - Z^*(ZZ^* + \lambda I)^{-1}Z$  is a positive operator, and  $(I - Z^*(ZZ^* + \lambda I)^{-1}Z) - (I - P)$  too. Now we can apply Prop. 5.  $\square$

**Proposition 4** (Cordes Inequality [9]). *Let  $A, B$  two positive semidefinite bounded linear operators on a separable Hilbert space. Then*

$$\|A^s B^s\| \leq \|AB\|^s \quad \text{when } 0 \leq s \leq 1.$$

**Proposition 5.** *Let  $\mathcal{H}, \mathcal{K}, \mathcal{F}, \mathcal{G}$  be three separable Hilbert spaces and let  $X : \mathcal{H} \rightarrow \mathcal{K}$  and  $Y : \mathcal{H} \rightarrow \mathcal{F}$  be two bounded linear operators. For any bounded linear operator  $Z : \mathcal{G} \rightarrow \mathcal{H}$ , if  $Y^*Y - X^*X$  is a positive self-adjoint operator then  $\|XZ\| \leq \|YZ\|$ .*

*Proof.* If  $Y^*Y - X^*X$  is a positive operator then  $Z^*(Y^*Y - X^*X)Z$  is positive too. Thus for all  $f \in \mathcal{H}$  we have that  $\langle f, (Q - P)f \rangle \geq 0$ , where  $Q = Z^*Y^*YZ$  and  $P = Z^*X^*XZ$ . Thus, by linearity of the inner product, we have

$$\|Q\| = \sup_{f \in \mathcal{G}} \langle f, Qf \rangle = \sup_{f \in \mathcal{G}} \{\langle f, Pf \rangle + \langle f, (Q - P)f \rangle\} \geq \sup_{f \in \mathcal{G}} \langle f, Pf \rangle = \|P\|.$$

$\square$

**Proposition 6.** *Let  $\mathcal{H}, \mathcal{K}$  be two separable Hilbert spaces, let  $A : \mathcal{H} \rightarrow \mathcal{H}$  be a positive linear operator,  $V : \mathcal{H} \rightarrow \mathcal{K}$  a partial isometry and  $B : \mathcal{K} \rightarrow \mathcal{K}$  a bounded operator. Then  $\|A^r V B V^* A^s\| \leq \|(V^* A V)^r B (V^* A V)^s\|$ , for all  $0 \leq r, s \leq 1/2$ .*

*Proof.* By Hansen's inequality (see [10]) we know that  $(V^*AV)^{2t} - V^*A^{2t}V$  is positive selfadjoint operator for any  $0 \leq t \leq 1/2$ , therefore we can apply Prop. 5 two times, obtaining

$$\|A^r V(BV^*A^s)\| \leq \|(V^*AV)^r (BV^*A^s)\| = \|((V^*AV)^r B)V^*A^s\| \leq \|((V^*AV)^r B)(V^*AV)^s\|.$$

□

**Proposition 7.** *Let  $\mathcal{H}$  be a separable Hilbert space, let  $A, B$  two bounded self-adjoint positive linear operators and  $\lambda > 0$ . Then*

$$\|(A + \lambda I)^{-1/2} B^{1/2}\| \leq (1 - \beta)^{-1/2}$$

when

$$\beta = \lambda_{\max} \left[ (B + \lambda I)^{-1/2} (B - A) (B + \lambda I)^{-1/2} \right] < 1.$$

*Proof.* Let  $B_\lambda = B + \lambda I$ . Note that

$$\begin{aligned} (A + \lambda I)^{-1} &= [(B + \lambda I) - (B - A)]^{-1} \\ &= \left[ B_\lambda^{1/2} \left( I - B_\lambda^{-1/2} (B - A) B_\lambda^{-1/2} \right) B_\lambda^{1/2} \right]^{-1} \\ &= B_\lambda^{-1/2} \left[ I - B_\lambda^{-1/2} (B - A) B_\lambda^{-1/2} \right]^{-1} B_\lambda^{-1/2}. \end{aligned}$$

Now let  $X = (I - B_\lambda^{-1/2} (B - A) B_\lambda^{-1/2})^{-1}$ . We have that,

$$\begin{aligned} \|(A + \lambda I)^{-1/2} B^{1/2}\| &= \|B^{1/2} (A + \lambda I)^{-1} B^{1/2}\|^{1/2} \\ &= \|B^{1/2} B_\lambda^{-1/2} X B_\lambda^{-1/2} B^{1/2}\|^{1/2} \\ &= \|X^{1/2} B_\lambda^{-1/2} B^{1/2}\|, \end{aligned}$$

because  $\|Z\| = \|Z^*Z\|^{1/2}$  for any bounded operator  $Z$ . Note that

$$\|X^{1/2} B_\lambda^{-1/2} B^{1/2}\| \leq \|X\|^{1/2} \|B_\lambda^{-1/2} B^{1/2}\| \leq \|X\|^{1/2}.$$

Finally let  $Y = B_\lambda^{-1/2} (B - A) B_\lambda^{-1/2}$  and assume that  $\lambda_{\max}(Y) < 1$ , then

$$\|X\| = \|(I - Y)^{-1}\| = (1 - \lambda_{\max}(Y))^{-1},$$

since  $X = w(Y)$  with  $w(\sigma) = (1 - \sigma)^{-1}$  for  $-\infty \leq \sigma < 1$ , and  $w$  is positive and monotonically increasing on the domain. □

## G Tail bounds

Let  $\|\cdot\|_{HS}$  denote the Hilbert-Schmidt norm.

**Proposition 8.** *Let  $v_1, \dots, v_n$  with  $n \geq 1$ , be independent and identically distributed random vectors on a separable Hilbert spaces  $\mathcal{H}$  such that  $Q = \mathbb{E} v \otimes v$  exists, is trace class, and for any  $\lambda > 0$  there exists a constant  $\mathcal{N}_\infty(\lambda) < \infty$  such that  $\langle v, (Q + \lambda I)^{-1} v \rangle \leq \mathcal{N}_\infty(\lambda)$  almost everywhere. Let  $Q_n = \frac{1}{n} \sum_{i=1}^n v_i \otimes v_i$  and take  $0 < \lambda \leq \|Q\|$ . Then for any  $\delta \geq 0$ , the following holds*

$$\|(Q + \lambda I)^{-1/2} (Q - Q_n) (Q + \lambda I)^{-1/2}\| \leq \frac{2\beta(1 + \mathcal{N}_\infty(\lambda))}{3n} + \sqrt{\frac{2\beta\mathcal{N}_\infty(\lambda)}{n}}$$

with probability  $1 - 2\delta$ . Here  $\beta = \log \frac{4 \text{Tr } Q}{\lambda \delta}$ . Moreover it holds that

$$\lambda_{\max} \left( (Q + \lambda I)^{-1/2} (Q - Q_n) (Q + \lambda I)^{-1/2} \right) \leq \frac{2\beta}{3n} + \sqrt{\frac{2\beta\mathcal{N}_\infty(\lambda)}{n}}$$

with probability  $1 - \delta$ .

*Proof.* Let  $Q_\lambda = Q + \lambda I$ . Here we apply Prop. 12 on the random variables  $Z_i = M - Q_\lambda^{-1/2} v_i \otimes Q_\lambda^{-1/2} v_i$  with  $M = Q_\lambda^{-1/2} Q Q_\lambda^{-1/2}$  for  $1 \leq i \leq n$ . Note that the expectation of  $Z_i$  is 0. The random vectors are bounded by

$$\|Q_\lambda^{-1/2} Q Q_\lambda^{-1/2} - Q_\lambda^{-1/2} v_i \otimes Q_\lambda^{-1/2} v_i\| \leq \langle v, Q_\lambda^{-1} v \rangle + \|Q_\lambda^{-1/2} Q Q_\lambda^{-1/2}\| \leq \mathcal{N}_\infty(\lambda) + 1$$

and the second ordered moment is

$$\begin{aligned} \mathbb{E}(Z_1)^2 &= \mathbb{E} \langle v_1, Q_\lambda^{-1} v_1 \rangle Q_\lambda^{-1/2} v_1 \otimes Q_\lambda^{-1/2} v_1 - Q_\lambda^{-2} Q^2 \\ &\leq \mathcal{N}_\infty(\lambda) \mathbb{E} Q_\lambda^{-1/2} v_1 \otimes Q_\lambda^{-1/2} v_1 = \mathcal{N}_\infty(\lambda) Q = S. \end{aligned}$$

Now we can apply Prop. 12. Now some considerations on  $\beta$ . It is  $\beta = \log \frac{4 \text{Tr } S}{\|S\| \delta} = \frac{4 \text{Tr } Q_\lambda^{-1} Q}{\|Q_\lambda^{-1} Q\| \delta}$ , now  $\text{Tr } Q_\lambda^{-1} Q \leq \frac{1}{\lambda} \text{Tr } Q$ . We need a lowerbound for  $\|Q_\lambda^{-1} Q\| = \frac{\sigma_1}{\sigma_1 + \lambda}$  where  $\sigma_1 = \|Q\|$  is the biggest eigenvalue of  $Q$ , now  $\lambda \leq \sigma_1$  thus  $\frac{\text{Tr } Q}{\lambda \delta}$ .

For the second bound of this proposition, the analysis remains the same except for  $L$ , indeed

$$\sup_{f \in \mathcal{H}} \langle f, Z_1 f \rangle = \sup_{f \in \mathcal{H}} \langle f, Q_\lambda^{-1} Q f \rangle - \langle f, Q_\lambda^{-1/2} v_i \rangle^2 \leq \sup_{f \in \mathcal{H}} \langle f, Q_\lambda^{-1} Q f \rangle \leq 1.$$

□

**Remark 1.** In Prop. 8, let define  $\kappa^2 = \inf_{\lambda > 0} \mathcal{N}_\infty(\lambda)(\|Q\| + \lambda)$ . When  $n \geq 405\kappa^2 \vee 67\kappa^2 \log \frac{\kappa^2}{2\delta}$  and  $\frac{9\kappa^2}{n} \log \frac{n}{2\delta} \leq \lambda \leq \|Q\|$  we have that

$$\lambda_{\max} \left( (Q + \lambda I)^{-1/2} (Q - Q_n) (Q + \lambda I)^{-1/2} \right) \leq \frac{1}{2},$$

with probability  $1 - \delta$ , while it is less than  $1/3$  with the same probability, if  $\frac{19\kappa^2}{n} \log \frac{n}{4\delta} \leq \lambda \leq \|Q\|$ .

**Proposition 9** (Theorem 2 [11]. Approximation of matrix products.). Let  $n, n$  be positive integers. Consider a matrix  $A \in \mathbb{R}^{n \times n}$  and denote by  $a_i$  the  $i$ -th column of  $A$ . Let  $m \leq n$  and  $I = \{i_1, \dots, i_m\}$  be a subset of  $N = \{1, \dots, n\}$  formed by  $m$  elements chosen randomly with replacement, according to a distribution that associates the probability  $P(i)$  to the element  $i \in N$ . Assume that there exists a  $\beta \in (0, 1]$  such that the probabilities  $P(1), \dots, P(n)$  satisfy  $P(i) \geq \beta \frac{\|a_i\|^2}{\text{Tr } A A^\top}$  for all  $i \in N$ . For any  $\delta > 0$  the following holds

$$\|A A^\top - \frac{1}{m} \sum_{i \in I} \frac{1}{P(i)} a_i a_i^\top\| \leq \frac{2L \log \frac{2n}{\delta}}{3m} + \sqrt{\frac{2LS \log \frac{2n}{\delta}}{m}}$$

with probability  $1 - \delta$ . Here  $L = \|A\|^2$  and  $S = \frac{1}{\beta} \text{Tr } A A^\top$ .

**Proposition 10** (Bernstein's inequality for sum of random variables). Let  $x_1, \dots, x_n$  be a sequence of independent and identically distributed random variables on  $\mathbb{R}$  with zero mean. If there exists an  $L, S \in \mathbb{R}$  such that  $x_1 \leq L$  almost everywhere and  $\mathbb{E} x_1^2 \leq S$ , then for any  $\delta > 0$  the following holds with probability  $1 - \delta$ :

$$\frac{1}{n} \sum_{i=1}^n x_i \leq \frac{2L \log \frac{1}{\delta}}{3n} + \sqrt{\frac{2S \log \frac{1}{\delta}}{n}}.$$

If there exists an  $L' \geq |x_1|$  almost everywhere, then the same bound, computed with  $L'$  instead of  $L$ , holds for the absolute value of the left hand side, with probability  $1 - 2\delta$ .

*Proof.* It is a restatement of Theorem 3 of [12]. □

**Proposition 11** (Bernstein's inequality for sum of random vectors). Let  $z_1, \dots, z_n$  be a sequence of independent identically distributed random vectors on a separable Hilbert space  $\mathcal{H}$ . Assume  $\mu = \mathbb{E} z_1$  exists and let  $\sigma, M \geq 0$  such that

$$\mathbb{E} \|z_1 - \mu\|_{\mathcal{H}}^p \leq \frac{1}{2} p! \sigma^2 L^{p-2}$$

for all  $p \geq 2$ . Then for any  $\tau \geq 0$ :

$$\left\| \frac{1}{n} \sum_{i=1}^n z_i - \mu \right\|_{\mathcal{H}} \leq \frac{2L \log \frac{2}{\delta}}{n} + \sqrt{\frac{2\sigma^2 \log \frac{2}{\delta}}{n}}$$

with probability greater or equal  $1 - \delta$ .

*Proof.* restatement of Theorem 3.3.4 of [13]. □

**Proposition 12** (Bernstein’s inequality for sum of random operators). *Let  $\mathcal{H}$  be a separable Hilbert space and let  $X_1, \dots, X_n$  be a sequence of independent and identically distributed self-adjoint positive random operators on  $\mathcal{H}$ . Assume that there exists  $\mathbb{E}X_1 = 0$  and  $\lambda_{\max}(X_1) \leq L$  almost everywhere for some  $L > 0$ . Let  $S$  be a positive operator such that  $\mathbb{E}(X_1)^2 \leq S$ . Then for any  $\delta \geq 0$  the following holds*

$$\lambda_{\max} \left( \frac{1}{n} \sum_{i=1}^n X_i \right) \leq \frac{2L\beta}{3n} + \sqrt{\frac{2\|S\|\beta}{n}}$$

with probability  $1 - \delta$ . Here  $\beta = \log \frac{2 \text{Tr } S}{\|S\|\delta}$ .

If there exists an  $L'$  such that  $L' \geq \|X_1\|$  almost everywhere, then the same bound, computed with  $L'$  instead of  $L$ , holds for the operatorial norm with probability  $1 - 2\delta$ .

*Proof.* The theorem is a restatement of Theorem 7.3.1 of [14] generalized to the separable Hilbert space case by means of the technique in Section 4 of [15]. □

## References

- [1] Adi Ben-Israel and Thomas NE Greville. *Generalized inverses: theory and applications*. Springer, 2003.
- [2] Alex J. Smola and Bernhard Schölkopf. Sparse Greedy Matrix Approximation for Machine Learning. In *ICML*, pages 911–918. Morgan Kaufmann, 2000.
- [3] C. Williams and M. Seeger. Using the Nyström Method to Speed Up Kernel Machines. In *NIPS*, pages 682–688. MIT Press, 2000.
- [4] S. Kumar, M. Mohri, and A. Talwalkar. Sampling methods for the Nyström method. *JMLR*, 13(1):981–1006, 2012.
- [5] Petros Drineas and Michael W. Mahoney. On the Nyström Method for Approximating a Gram Matrix for Improved Kernel-Based Learning. *JMLR*, 6:2153–2175, December 2005.
- [6] A. Gittens and M. W. Mahoney. Revisiting the Nystrom method for improved large-scale machine learning. 28:567–575, 2013.
- [7] Andrea Caponnetto and Ernesto De Vito. Optimal rates for the regularized least-squares algorithm. *Foundations of Computational Mathematics*, 7(3):331–368, 2007.
- [8] Alessandro Rudi, Guillermo D. Canas, and Lorenzo Rosasco. On the Sample Complexity of Subspace Learning. In *NIPS*, pages 2067–2075, 2013.
- [9] Junichi Fujii, Masatoshi Fujii, Takayuki Furuta, and Ritsuo Nakamoto. Norm inequalities equivalent to Heinz inequality. *Proceedings of the American Mathematical Society*, 118(3), 1993.
- [10] F. Hansen. An operator inequality. *Mathematische Annalen*, 246(3), 1980.
- [11] A. Alaoui and M. W. Mahoney. Fast randomized kernel methods with statistical guarantees. *arXiv*, 2014.
- [12] Stéphane Boucheron, Gábor Lugosi, and Olivier Bousquet. Concentration inequalities. In *Advanced Lectures on Machine Learning*. 2004.
- [13] Vadim Vladimirovich Yurinsky. *Sums and Gaussian vectors*. 1995.
- [14] Joel A Tropp. User-friendly tools for random matrices: an introduction. 2012.
- [15] Stanislav Minsker. On some extensions of Bernstein’s inequality for self-adjoint operators. *arXiv*, 2011.
